# Supplementary material
Source: publisher figshare collection journal article supplement (https://acs.figshare.com/ndownloader/files/7860490)
Supplement: Supplementary file 1 [file 7860490]

# Bovine serum albumin-coated graphene oxide (GO) for effective adsorption of uranium (VI) from aqueous solutions

*Peipei Yang<sup>a</sup>, Qi Liu<sup>a,\*</sup>, Jingyuan Liu<sup>a</sup>, Hongsen Zhang<sup>a</sup>, Zhanshuang Li<sup>a</sup>, Rumin Li<sup>a</sup>, Lianhe Liu<sup>a,b</sup> and Jun Wang<sup>a,b,\*</sup>*

<sup>a</sup> Key Laboratory of Superlight Material and Surface Technology, Ministry of Education

<sup>b</sup> Institute of Advanced Marine Material, Harbin Engineering University, Harbin 150001, People's Republic of China,

\* Corresponding author: E-mail address: *zhqw1888@sohu.com, qiliu@hrbeu.edu.cn*

## **SI.1 Characterization**

The structure of the material was measured by a transmission electron microscope (TEM) from FEI Tecnai G2 S-Twin, SEM and FTIR from the SP100. X-ray diffraction analyzer (XRD) was performed on a Rigaku D-max-IIIB diffractometer with CuK $\alpha$  irradiation ( $K\alpha = 1.54178 \text{ \AA}$ ). The BSA-GO composites were calculated using the Bruker of atomic force microscopy (AFM). The adsorption experiment measurement was carried out with WGJ-III Trace Uranium Analyzer. XPS analyzer was conducted using an AXIS ULTRA DLD spectrometer from Japan, which

include in a monochromatized Al K $\alpha$  X-ray source (1486.6 eV photons) at a constant residence time (250 ms) and a pass energy (40 eV).

## SI.2 The synthesis lines and mechanism of the GO-BSA composites

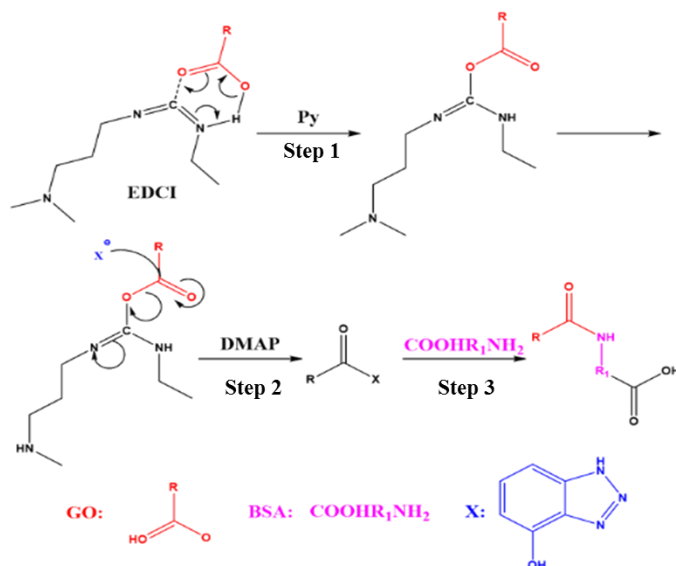

**Scheme S1.** The proposed mechanism of the GO-BSA composites

## SI.3 Adsorption studies on GO-BSA composites.

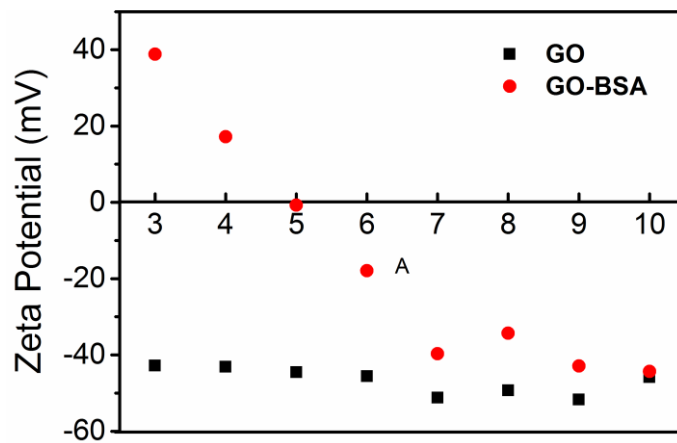

**Fig. S1**  $\zeta$ -potential of GO and GO-BSA at different pH values

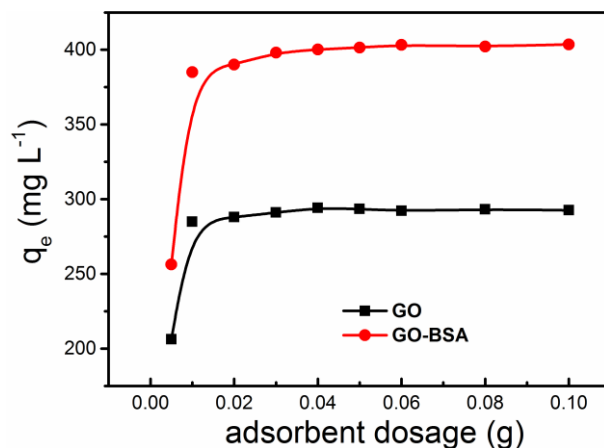

**Fig. S2** Effect of adsorbent dosage on adsorption capacities of GO and GO-BSA, pH = 6.00; T = 25 °C; V = 20 mL.

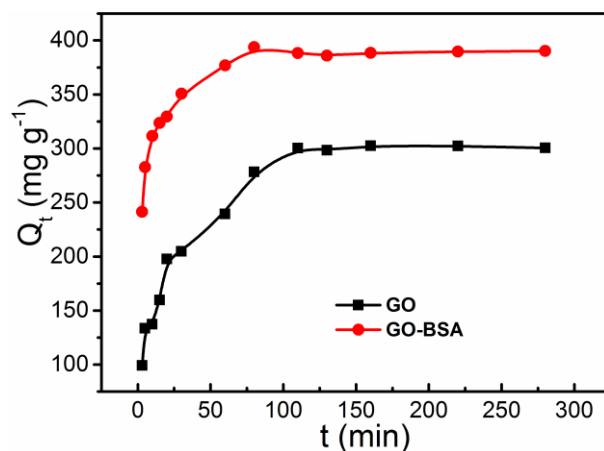

**Fig. S3** Effect of contact time of U(VI) adsorption on GO and GO-BSA composites, pH= 6.0; T = 25 °C; amount of adsorbent 0.01 g and  $C_0 = 200 \text{ mg L}^{-1}$ .

#### SI.4 Adsorption kinetics and adsorption isotherms on GO-BSA composites

In order to get more information about sorption process, the pseudo-first-order kinetic model, pseudo-second-order kinetic and Weber-Morris (W-M) model were studied<sup>1</sup>. The following equation holds true in the pseudo-first-order kinetic model

$$\ln(Q_e - Q_t) = \ln Q_e - k_1 t \quad (\text{S1})$$

Where  $k_1$  is the rate constant of pseudo-first-order adsorption,  $Q_e$  and  $Q_t$  ( $\text{mg g}^{-1}$ ) are the amount of U(VI) adsorbed capacity at equilibrium and at time (t), respectively.

The pseudo-second order kinetic model is shown as the following:

$$t/Q_t = 1/k_2 Q_e^2 + t/Q_e \quad (\text{S2})$$

Where  $k_2$  ( $\text{g mg}^{-1} \text{ min}^{-1}$ ) is a constant of pseudo-second-order adsorption,  $Q_t$  ( $\text{mg g}^{-1}$ ) is the amount of U(VI) ions the amount of U(VI) adsorbed capacity at time t (h),  $Q_e$  ( $\text{mg g}^{-1}$ ) is the sorption amount at equilibrium and t (h) is the reaction time.

The Weber-Morris (W-M) models is shown as the following:

$$Q_e = K_{ip}\sqrt{t} + C \quad (\text{S3})$$

Where  $k_{ip}$  is a constant of Intramolecular diffusion,  $Q_e$  ( $\text{mg g}^{-1}$ ) is the amount of U(VI) ions at equilibrium and t (h) is the reaction time., C is a constant of material boundary layer ( $\text{mg g}^{-1}$ ) and t (h) is the reaction time.

**Table S1** Kinetic parameter for adsorption of U(VI), pH= 6.0; T = 25 °C

| Materials | Pseudo-second order kinetics model |        |                    | Pseudo-first order kinetics model |       |                     |        |
|-----------|------------------------------------|--------|--------------------|-----------------------------------|-------|---------------------|--------|
|           | $Q_{e,\text{exp}}$                 | $R^2$  | $k_2$              | $Q_{e2,\text{cal}}$               | $k_1$ | $Q_{e1,\text{cal}}$ | $R^2$  |
| GO-BSA    | 391                                | 0.9998 | $6.08 \times 10^7$ | 393.15                            | 0.016 | 71.70               | 0.7881 |
| GO        | 301                                | 0.9975 | $2.79 \times 10^6$ | 317.50                            | 0.023 | 2.71                | 0.8063 |

Meanwhile, in order to get more information about sorption progress, the Langmuir and Freundlich equations model were studied<sup>1</sup>. The Langmuir equation is supposed that the surface

and bulk phases of homogeneous sorbents delete it has been extensively used to describe the monolayer sorption process, which is expressed as follows:

$$C_e/Q_e = 1/b \cdot Q_m + C_e/Q_m \quad (S4)$$

Where  $C_e$  ( $\text{mg g}^{-1}$ ) is the solute equilibrium concentration,  $Q_e$  ( $\text{mg g}^{-1}$ ) is the amount of solution adsorbed per unit mass of the adsorbent,  $Q_m$  is the maximum adsorption capacity ( $\text{mg g}^{-1}$ ),  $b$  is Langmuir constant. According to Eq. (S4), fitting a straight line is obtained and presented in Fig. 5. The values of  $Q_m$  and  $b$  were calculated from the slope and the intercept, and were given in Table S2.

The Freundlich equation has been used for heterogeneous surfaces and multilayer adsorption. It is expressed as follows<sup>3</sup>:

$$\ln Q_e = \ln k + 1/n \ln C_e \quad (S5)$$

Where  $k$  ( $\text{L g}^{-1}$ ) is the Freundlich sorption coefficient,  $1/n$  is an indicator of isotherm nonlinearity corresponding to the sorption intensity at a particular temperature. The linear dependency of the Freundlich model of U(VI) sorption is shown in Fig. 5. They are determined from the intercept and slope of the linear plot of  $\ln Q_e$  vs.  $\ln C_e$ .

The Temkin equation has been used for the interaction between the adsorbent and the adsorbate. It is expressed as follows:

$$Q_e = A \ln K_T + A \ln C_e \quad (S6)$$

Where  $k$  ( $\text{L g}^{-1}$ ) is the Temkin coefficient,  $A$  is the maximum binding energy of the equilibrium binding constant.  $C_e$  ( $\text{mg g}^{-1}$ ) is the solute equilibrium concentration,  $Q_e$  ( $\text{mg g}^{-1}$ ) is the amount of solution adsorbed per unit mass of the adsorbent. The linear dependency of the Temkin model of

U(VI) sorption is shown in Fig. S4. They are determined from the intercept and slope of the linear plot of  $Q_e$  vs.  $\ln C_e$ . According to the  $R^2$  value, the Temkin Model was applicable to the experimental data of GO, not appropriate to the GO-BSA composites.

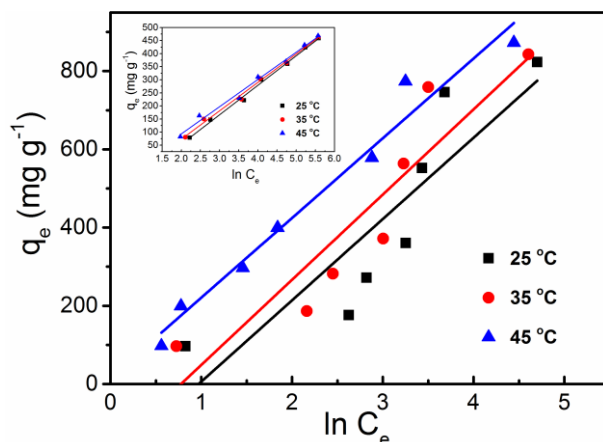

**Fig. S4** Temkin model for the removal of U(VI) on GO (inset) and GO-BSA composites, pH= 6.00; T= 25 °C; amount of adsorbent 0.01 g;  $C_o$ = 200 mg L<sup>-1</sup> and t= 80 min.

**Table S2.** Isotherm Models and values of  $R^2$  for GO and GO-BSA composites

| Materials | T(K)   | Langmuir isotherm              |                            |        | Freundlich isotherm       |       |        |
|-----------|--------|--------------------------------|----------------------------|--------|---------------------------|-------|--------|
|           |        | $Q_m$<br>(mg·g <sup>-1</sup> ) | b<br>(L·mg <sup>-1</sup> ) | $R^2$  | K<br>(L·g <sup>-1</sup> ) | n     | $R^2$  |
| GO-BSA    | 298.15 | 389                            | 2.46                       | 0.9979 | 51.52                     | 1.606 | 0.9099 |
|           | 308.15 | 398                            | 2.65                       | 0.9986 | 61.29                     | 1.611 | 0.8428 |
|           | 318.15 | 419                            | 2.78                       | 0.9997 | 119.34                    | 1.933 | 0.8644 |
| GO        | 298.15 | 301                            | 3.28                       | 0.9960 | 33.12                     | 2.021 | 0.9327 |
|           | 308.15 | 306                            | 3.68                       | 0.9949 | 38.48                     | 2.131 | 0.9284 |
|           | 318.15 | 311                            | 4.13                       | 0.9936 | 45.33                     | 2.269 | 0.9166 |

| Materials | T(K)   | Tempkin Model |      |        |
|-----------|--------|---------------|------|--------|
|           |        | $K_T$         | A    | $R^2$  |
| GO-BSA    | 298.15 | 1.04          | 2.03 | 0.7282 |
|           | 308.15 | 1.06          | 2.07 | 0.8226 |
|           | 318.15 | 1.09          | 2.17 | 0.9668 |
| GO        | 298.15 | 2.19          | 1.12 | 0.9946 |
|           | 308.15 | 3.06          | 1.14 | 0.9932 |
|           | 318.15 | 3.79          | 1.15 | 0.9889 |

For the comparison of the linear isotherm data with non-linear isotherm, this non-linear isotherm was fitted and shown in the Fig. S5 and Table S3. From the Fig. S5, we can observed that the GO and GO-BSA were appropriate to the Langmuir model rather than the Freundlich model and Temkin model. Meanwhile, we also calculated the parameters, the results are shown in the table S3

**Table S3.** Isotherm Models and values of  $R^2$  for GO and GO-BSA composites

| Materials | T(K)   | Langmuir isotherm                 |                                   |        | Freundlich isotherm              |       |        |
|-----------|--------|-----------------------------------|-----------------------------------|--------|----------------------------------|-------|--------|
|           |        | $Q_m$                             | b                                 | $R^2$  | K                                | n     | $R^2$  |
|           |        | ( $\text{mg}\cdot\text{g}^{-1}$ ) | ( $\text{L}\cdot\text{mg}^{-1}$ ) |        | ( $\text{L}\cdot\text{g}^{-1}$ ) |       |        |
| GO-BSA    | 298.15 | 566                               | 2.75                              | 0.9745 | 77                               | 1.823 | 0.8719 |
|           | 308.15 | 614                               | 2.95                              | 0.9756 | 104                              | 2.015 | 0.8104 |
|           | 318.15 | 662                               | 3.27                              | 0.9809 | 186                              | 2.612 | 0.7816 |
| GO        | 298.15 | 470                               | 3.68                              | 0.9919 | 49.87                            | 0.037 | 0.9584 |
|           | 308.15 | 488                               | 3.88                              | 0.998  | 55.68                            | 0.388 | 0.9586 |
|           | 318.15 | 515                               | 4.06                              | 0.9908 | 63.08                            | 0.406 | 0.9572 |

| Materials | T(K)   | D-R model                                    |        | Temkin model |      |        |
|-----------|--------|----------------------------------------------|--------|--------------|------|--------|
|           |        | $Q_m$<br>( $\text{mg} \cdot \text{g}^{-1}$ ) | $R^2$  | $K_T$        | A    | $R^2$  |
| GO-BSA    | 298.15 | 616                                          | 0.8429 | 1.28         | 1.83 | 0.7854 |
|           | 308.15 | 693                                          | 0.9032 | 1.52         | 2.18 | 0.8389 |
|           | 318.15 | 703                                          | 0.9658 | 1.64         | 2.38 | 0.9629 |
| GO        | 298.15 | 452                                          | 0.9805 | 2.21         | 1.05 | 0.9946 |
|           | 308.15 | 455                                          | 0.9752 | 3.12         | 1.12 | 0.9932 |
|           | 318.15 | 587                                          | 0.9661 | 3.49         | 1.16 | 0.9889 |

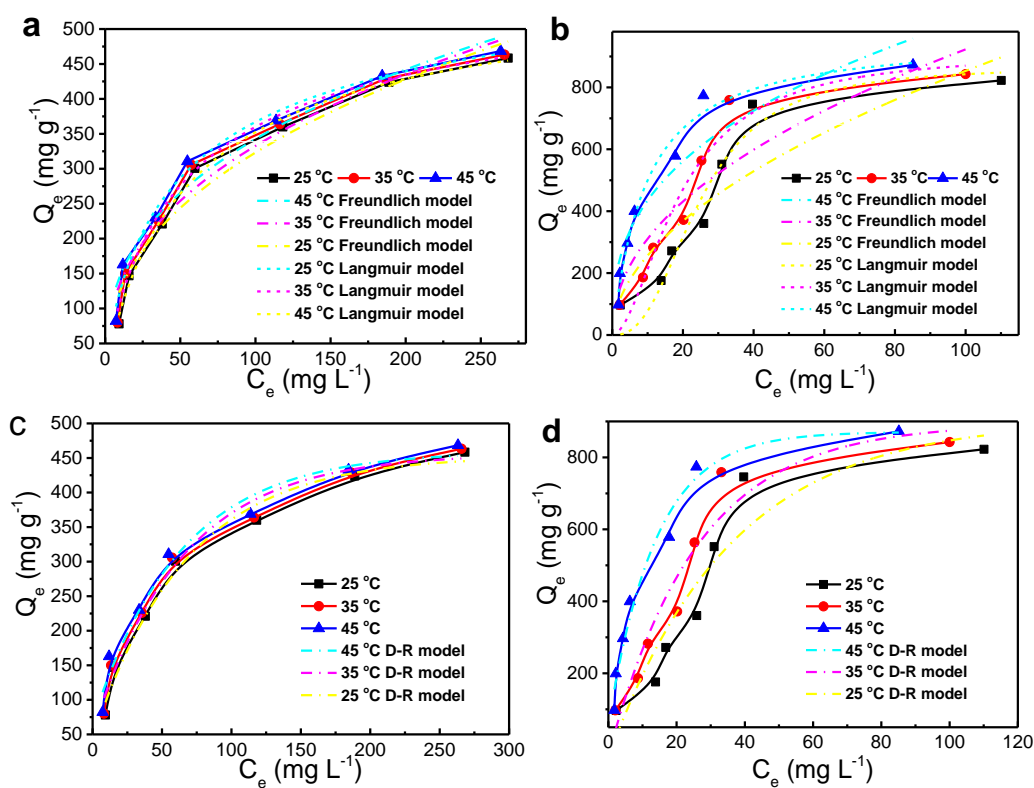



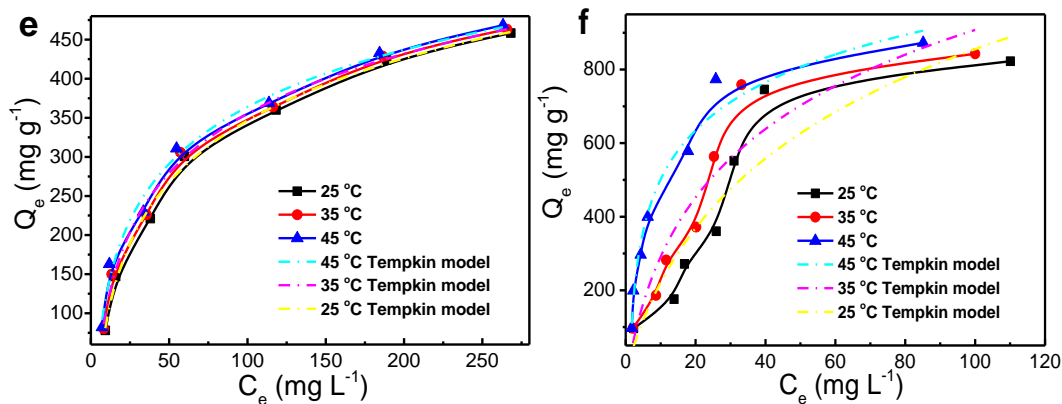

**Fig. S5** Freundlich model, Langmuir model, D-R model and Temkin model for the removal of U(VI) on GO (a, c, e) and GO-BSA (b, d, f) composites, pH= 6.00; T= 25 °C; amount of adsorbent 0.01 g;  $C_o = 200 \text{ mg L}^{-1}$  and  $t = 80 \text{ min}$ .

### SI.5 Calculations for thermodynamic parameters

The thermodynamic parameters of U(VI) adsorption expounded that the adsorption capacity of GO-BSA composites show a rising trend with the change of temperature, indicating the adsorption behavior is endothermic. These formula was used to calculate the thermodynamic data<sup>3</sup>

$$\ln K_d = \Delta S^\circ / R - \Delta H^\circ / RT \quad (\text{S7})$$

$$\Delta G^\circ = \Delta H^\circ - T\Delta S^\circ \quad (\text{S8})$$

$$K_d = Q_e / C_e = (C_o - C_e) V / C_e m \quad (\text{S9})$$

Where  $K_d$  ( $\text{mL g}^{-1}$ ) is the distribution coefficient of U(VI),  $T$  (K) is the Kelvin temperature and  $R = 8.314 \text{ J mol}^{-1} \text{ K}^{-1}$ . The function of  $\Delta H^\circ$  (standard enthalpy change) and  $\Delta S^\circ$  (standard entropy change) were counted by the Fig. 6.  $\Delta G^\circ$  (standard Gibbs energy) can be calculated using Eq.: (S7-S9). Table S4 shown the values of thermodynamic for the adsorption of U(VI) under the three temperatures, which also implied the adsorption process of U(VI) is endothermic. The

value of  $\Delta G^\circ$  illustrated that the adsorption process of GO-BSA composites were feasible and spontaneous.

**Table S4.** The thermodynamic parameters for U(VI) adsorption

| Materials | $\Delta H^\circ$<br>(kJ mol <sup>-1</sup> ) | $\Delta S^\circ$<br>(J mol <sup>-1</sup> K <sup>-1</sup> ) | $\Delta G^\circ$<br>(kJ mol <sup>-1</sup> ) |         |         |
|-----------|---------------------------------------------|------------------------------------------------------------|---------------------------------------------|---------|---------|
| GO-BSA    | 21.84                                       | 91.9                                                       | 298.15K                                     | 308.15K | 318.15K |
|           |                                             |                                                            | -5.5600                                     | -6.2324 | -7.3980 |
| GO        | 5.24                                        | 29.29                                                      | 298.15K                                     | 308.15K | 318.15K |
|           |                                             |                                                            | -3.4928                                     | -3.7857 | -4.078  |

#### SL.6 Analysis for XPS

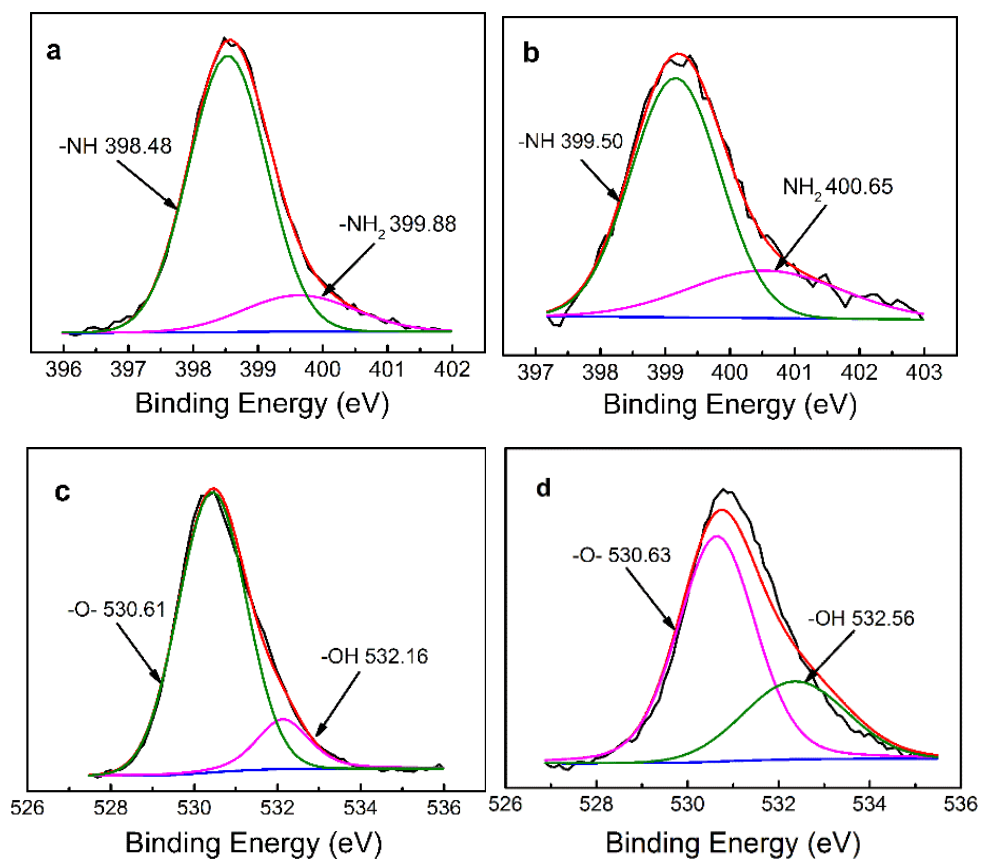

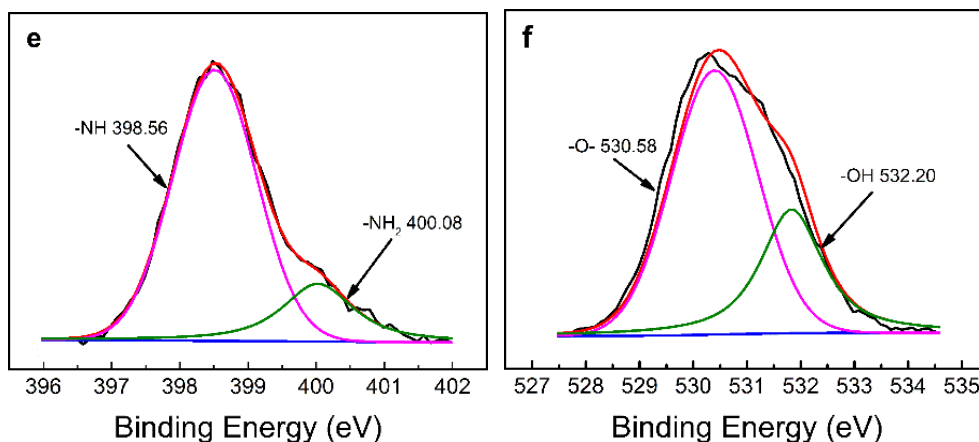

**Fig. S6** The fitting peaks of GO-BSA, GO-BSA-U and Desorption-GO-BSA, (a): N 1s of GO-BSA; (b): N 1s of GO-BSA-U; (c): O 1s of GO-BSA; (d): O 1s of GO-BSA-U, (e): N 1s of Desorption-GO-BSA, and (f): O 1s of Desorption-GO-BSA <sup>1-3</sup>

## SI.7 Desorption data of U(VI) on GO-BSA composites.

### SI.7.1 U(VI) desorption experiments

In a typical experiment, 20 mg of sorbent with U(VI) ions was added into 50 mL eluent solution, which included in 0.1 M HCl, 0.1 M NaHCO<sub>3</sub>, 0.1 M NaOH and H<sub>2</sub>O, respectively. The flasks were stirred for specified time (t, min) at room temperature, and then the solid phase was separated from the solution by centrifuge. These results were analyzed with WGJ-III Trace Uranium Analyzer to obtain the concentrations of U(VI) ions. The elution rate of U(VI) ions was calculated.

**Table S5.** The elution efficiency upon different elution solution.

| Eluent             | Elution efficiency (%) |
|--------------------|------------------------|
| H <sub>2</sub> O   | 7.52                   |
| HCl                | 80.13                  |
| NaHCO <sub>3</sub> | 69.86                  |
| NaOH               | 51.21                  |

#### **SI.7.2 U(VI) adsorption-desorption cycle experiments**

In a typical experiment, 20 mg of sorbent was added into 50 mL of U(VI) solution and stirred for 6 h at room temperature. The solid phase was separated from the solution by centrifuge. Then, the sorbent was dried in the vacuum oven for 24 h. The dried sorbent was placed in the 50 mL eluent solution (0.5 M HCl) for the 6 h. After elution, the GO-BSA composites were washed with abundant deionized water to remove residual H<sup>+</sup> and UO<sub>2</sub><sup>2+</sup> until cannot be detected in the aqueous solutions. The GO-BSA composites were regenerated by drying in vacuum oven for 24 h and then reused. Eventually the elution efficiency of U(VI) ions was calculated. Repeat this experiment operation for five times.

#### **SI.7.3 adsorption-desorption of FTIR**

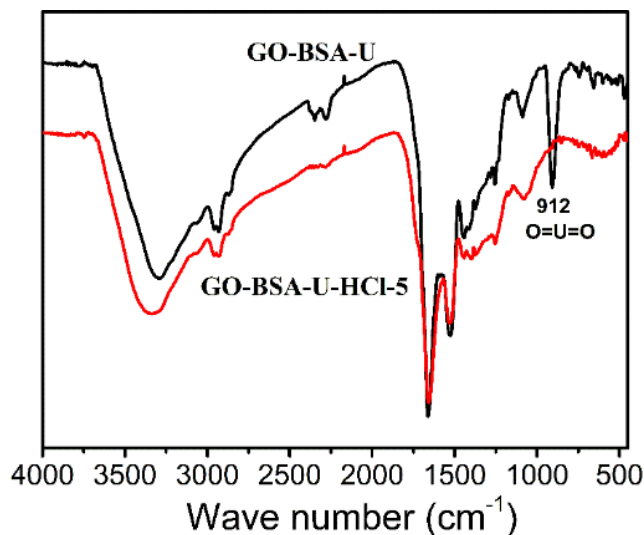

**Fig. S7.** FTIR of GO-BSA composites absorption for U(VI) and adsorption-desorption five times for U(VI)

## REFERENCES

- (1) Y. Sun, Z.-Y. Wu, X. Wang, C. Ding, W. Cheng, S.-H. Yu, X. Wang, Macroscopic and microscopic investigation of U (VI) and Eu (III) adsorption on carbonaceous nanofibers, *Environ. Sci. Technol.* **2016**, 50(8), 4459-4467.
- (2) A. Ithurbide, I. Frateur, A. Galtayries, P. Marcus, XPS and flow-cell EQCM study of albumin adsorption on passivated chromium surfaces: Influence of potential and pH, *Electrochim. Acta*, **2007**, 53(3), 1336-1345.
- (3) J. Wang, B. Deng, H. Chen, X. Wang, J. Zheng, Removal of aqueous Hg (II) by polyaniline: sorption characteristics and mechanisms, *Environ. Sci. Technol.* **2009**, 43(14), 5223-5228.
